# Supplementary material for: Involvement of Cl−/HCO3− exchanger SLC26A3 and SLC26A6 in preimplantation embryo cleavage
Source: PubMed Central journal article supplement (PMC4921817; doi:10.1038/srep28402), 2016-06-27
Supplement: srep28402-s1.pdf [file srep28402-s1.pdf]

## **Involvement of Cl<sup>-</sup>/HCO<sub>3</sub><sup>-</sup> exchanger SLC26A3 and SLC26A6 in preimplantation embryo cleavage**

Yong Chao Lu<sup>1,5,†</sup>, Jing Yang<sup>3†</sup>, Kin Lam Fok<sup>2</sup>, Ying Hui Ye<sup>1,5</sup>, Liang Jin<sup>1,5</sup>, Zheng Yun Chen<sup>1</sup>, Xin Mei Zhang<sup>1</sup>, He Feng Huang<sup>4,5\*</sup>, Hsiao Chang Chan<sup>2,\*</sup>

<sup>1</sup>Department of Obstetrics and Gynecology, Women's Hospital, Zhejiang University School of Medicine, Hangzhou, Zhejiang, China

<sup>2</sup>Epithelial Cell Biology Research Center, School of Biomedical Sciences, Faculty of Medicine, The Chinese University of Hong Kong, Sha Tin, NT, Hong Kong SAR, China

<sup>3</sup>Department of Assisted Reproduction, Shanghai Ninth People's Hospital, Shanghai Jiaotong University School of Medicine, Shanghai, China

<sup>4</sup>The International Peace Maternity and Child Health Hospital, Shanghai Jiao Tong University School of Medicine, Shanghai, China

<sup>5</sup>The Key Laboratory of Reproductive Genetics, Ministry of Education (Zhejiang University), Hangzhou, China

<sup>†</sup>These authors contributed equally to this work.

## Supplementary figure legend

**Supplemental Figure S1. HCO<sub>3</sub><sup>-</sup> ion is required for embryo cleavage.** **A**, Four-cell embryo formation after 12 hours of 2-cell embryo culture in TALP medium with varying concentrations of HCO<sub>3</sub><sup>-</sup> and constant Cl<sup>-</sup> concentration (115 mM) (50 mM: 27/35 embryos; 25 mM: 35/40 embryos; 12.5 mM: 15/34 embryos; 0 mM: 3/34). Scale bar: 100 μm. **B**, Summary of the results from **C**. ns indicates  $P > 0.05$ , \*\*\* indicates  $P < 0.001$  (by one-way ANOVA,  $n = 4$ ).

**Supplemental Figure S2. Expression of SLC channels mRNA in 2-cell to 8-cell embryos.** Quantitative real-time PCR results showing the mRNA expression level of SLC channel family members. The expression was normalized to rRNA expression in 2-cell to 8-cell embryos.

**Supplemental Figure S3. Dose-dependent effects of niflumate and DIDS on inhibiting embryo cleavage.** Embryos were treated with indicated concentration of niflumate or DIDS in complete TALP. a, Compared with DIDS control,  $P < 0.05-0.01$ ; b, compared with niflumate control,  $P < 0.05-0.001$ ; c, compared with corresponding DIDS treatment,  $P < 0.05-0.01$ . ( $n = 4$ ).

**Supplemental Table 1. List of primers used.**

A

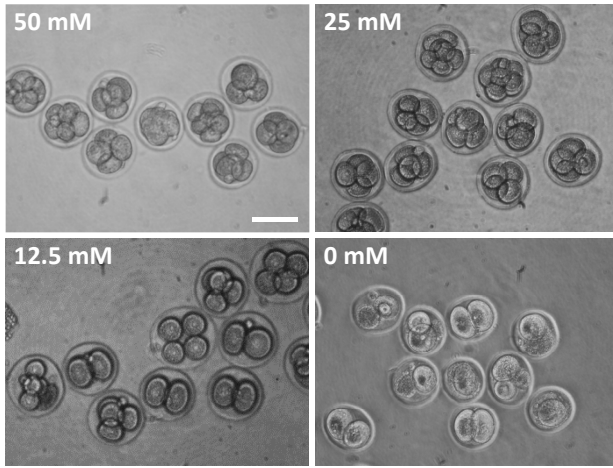

B

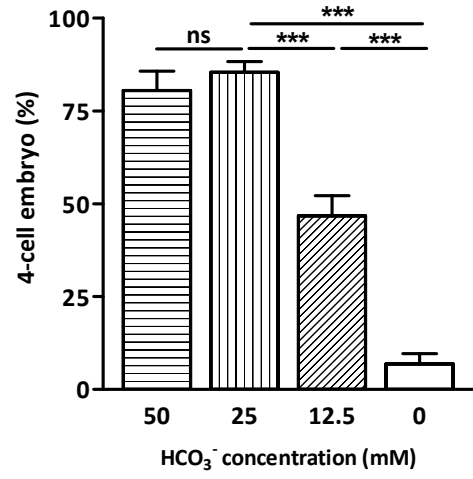

SLC mRNA expression in embryo (2-8-cell)

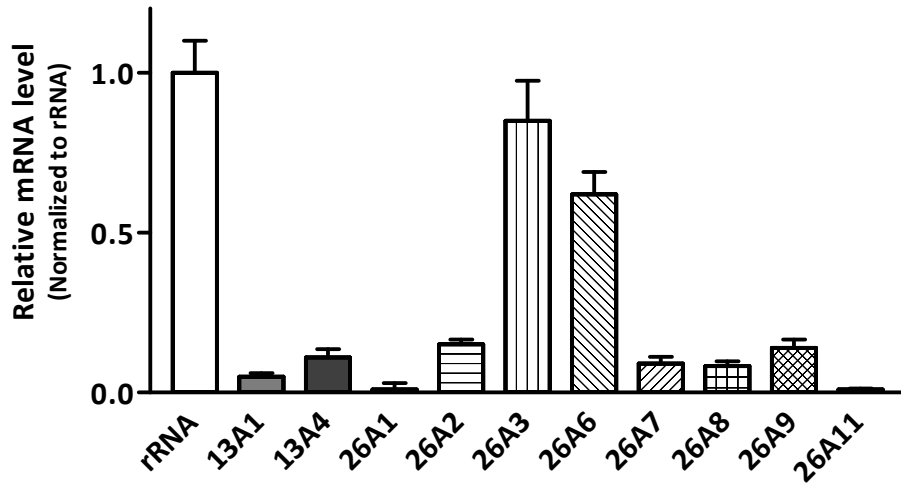

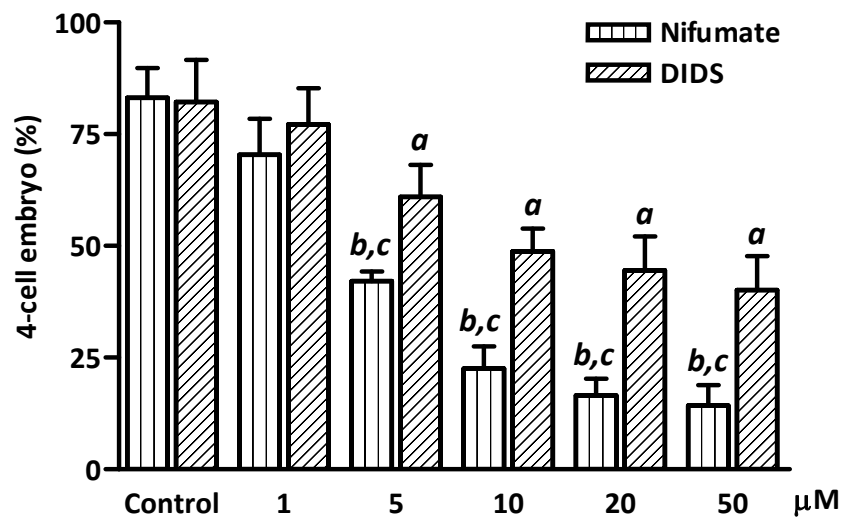

**Supplementary Table 1: Table Nucleotide sequences of primers used for quantitative real-time PCR (qPCR) (SYBR Green)**

| Target RNA     | Forward (5'- 3')          | Reverse (5'- 3')        |
|----------------|---------------------------|-------------------------|
| Mouse SLC13A1  | CTATCGCCGCTTTCTCCTTGT     | GGCAGTAGAGCTGTGATTGACA  |
| Mouse SLC13A4  | GGAAGCTGCTATTGGTCATCTG    | GGTCACAAGCAACACGTAAGC   |
| Mouse SLC26A1  | CAGAAGGGTGGGACACTGGTA     | ACATCACCTGCTAGGTATTCTT  |
| Mouse SLC26A2  | AAGAGCAGCATGACCTCTCAC     | CTGCCTCAAGTCAGTGCCT     |
| Mouse SLC26A3  | CTGAAGCGCCACACTGAATA      | CTGGTGACAGTGGCTAGTGG    |
| Mouse SLC26A6  | TGCGGAGCCTTAGTTTACCG      | ACTCCTCGGTAAGCAGCAAC    |
| Mouse SLC26A7  | CCCCACCGAGAAGACATTAAGC    | TGAACTGCCAACATTATCCCAG  |
| Mouse SLC26A8  | TTTTGTGTACGATGTTAAGCGGA   | GTGGTGCTTGAAAGTGGTGA    |
| Mouse SLC26A9  | CCCCGCTACGTGGTAGACA       | AGCACCTGAAAGTGTTCGA     |
| Mouse SLC26A11 | AGTGTATGCGGGAACACATGC     | CGAAGGCGTAAGCAATCAGAG   |
| Mouse rRNA     | GTAACCCGTTGAACCCATT       | CCATCCAATCGGTAGTAGCG    |
| Mouse p53      | GTCAAGAAAGTGGGGCCTGA      | TGAGTGGAATCTGGGATTGTG   |
| Mouse p21      | CCAGATCTCCGGAGCCAGG       | GAGGGGCGTCATCAAAGGAA    |
| Mouse FGF2     | ACTGTCCTGTCAGTGTGGAT      | AGTGCCACATACCAACTGGAG   |
| Mouse GAPDH    | CCCCAGCAAGGACACTGAGCAAGAG | GCCCTCCTGTTATTATGGGGGTC |
| Human SLC26A3  | CAGTGGCCTTTTCAGTTGCC      | GGGCAGTACTCCCAGCAAAT    |
| Human SLC26A6  | TACAGTGATGCGCTGAAGCA      | CCAGACATGCAGACAAAAGGG   |
| Human GAPDH    | CTTCTTTTGCGTCGCCAGCC      | TCCGTTGACTCCGACCTTCA    |
